# Supplementary material for: Intravenous versus oral antibiotics for eradication of Pseudomonas aeruginosa in cystic fibrosis (TORPEDO-CF): a randomised controlled trial
Source: PubMed Central journal article supplement (PMC7606906; doi:10.1016/s2213-2600(20)30331-3), 2020-10
Supplement: mmc1.pdf [file mmc1.pdf]

# THE LANCET

## Respiratory Medicine

### Supplementary appendix

This appendix formed part of the original submission and has been peer reviewed. We post it as supplied by the authors.

Supplement to: Hewer SCL, Smyth AR, Brown M, et al. Intravenous versus oral antibiotics for eradication of *Pseudomonas aeruginosa* in cystic fibrosis (TORPEDO-CF): a randomised controlled trial. *Lancet Respir Med* 2020; **8**: 975–86.

## TORPEDO-CF Study Group participating centres and investigators

| Participating Centre                                   | Investigators               |
|--------------------------------------------------------|-----------------------------|
| Addenbrooke's Hospital – Paediatrics                   | Dr Robert Ross-Russell      |
| Alder Hey Children's Hospital - Paediatrics            | Professor Kevin Southern    |
| Barts and The London Children's Hospital - Paediatrics | Dr Chinedu Nwokoro          |
| Belfast City Hospital - Adults                         | Dr Damian Downey            |
| Birmingham Children's Hospital - Paediatrics           | Dr Maya Desai               |
| Birmingham Heartlands Hospital - Adults                | Dr Joanna L. Whitehouse     |
| Birmingham Heartlands Hospital - Paediatrics           | Dr Sarah Denniston          |
| Bradford Royal Infirmary - Paediatrics                 | Dr Eduardo Moya             |
| Bristol Royal Hospital for Children - Paediatrics      | Dr Simon Langton Hewer      |
| Bristol Royal Infirmary - Adults                       | Dr Simon Langton Hewer      |
| Chesterfield Royal Hospital - Paediatrics              | Professor Jim Crossley      |
| Conquest Hospital - Paediatrics                        | Dr Geeta Gopal              |
| Countess of Chester Hospital - Paediatrics             | Dr Ravi Jayaram             |
| Darlington Memorial Hospital - Paediatrics             | Dr John Furness             |
| Derriford Hospital - Adults                            | Dr David Derry              |
| Derriford Hospital - Paediatrics                       | Dr Alan Cade                |
| Eastbourne District General Hospital - Paediatrics     | Dr. Geeta Gopal             |
| Genoa CF Centre - Adults                               | Dr Laura Minicucci          |
| Genoa CF Centre - Paediatrics                          | Dr Laura Minicucci          |
| Gloucestershire Royal Hospital - Paediatrics           | Dr Mike Webb                |
| Great Ormond Street Hospital - Paediatrics             | Dr Colin Wallis             |
| Hillingdon Hospital - Paediatrics                      | Dr Stephen Goldring         |
| Hull Royal Infirmary - Paediatrics                     | Dr Ashwini Kotwal           |
| James Cook University Hospital - Paediatrics           | Dr Rajamanickam Jayaraj     |
| James Paget Hospital - Paediatrics                     | Dr Caroline Kavanagh        |
| Kettering General Hospital - Paediatrics               | Dr Patti Rao                |
| King's College Hospital - Paediatrics                  | Dr Gary Ruiz                |
| King's Mill Hospital - Paediatrics                     | Dr Mike Yanney              |
| Leicester Children's Hospital - Paediatrics            | Dr Erol Gaillard            |
| Leighton Hospital - Paediatrics                        | Dr Julie Ellison            |
| Lincoln County Hospital - Paediatrics                  | Dr Amol Chingale            |
| Macclesfield District General Hospital - Paediatrics   | Dr Surendran Chandrasekaran |
| Musgrove Park Hospital - Paediatrics                   | Dr Alexandra Powell         |
| New Cross Hospital - Paediatrics                       | Dr Rosie Rayner             |
| Norfolk & Norwich University Hospital - Paediatrics    | Dr Caroline Kavanagh        |
| North Devon District Hospital - Paediatrics            | Dr Dermot Dalton            |
| Nottingham City Hospital - Adults                      | Dr Jane Dewar               |
| Nottingham Children's Hospital - Paediatrics           | Professor Alan Smyth        |
| Oxford Children's Hospital - Paediatrics               | Dr Jeremy Hull              |
| Pilgrim Hospital - Paediatrics                         | Dr Margaret Crawford        |
| Queen Alexandra Hospital - Paediatrics                 | Dr Hannah Buckley           |

| <b>Participating Centre</b>                           | <b>Investigators</b>       |
|-------------------------------------------------------|----------------------------|
| Royal Alexandra Children's Hospital - Paediatrics     | Dr Paul Seddon             |
| Royal Berkshire Hospital - Paediatrics                | Dr Claire Holt             |
| Royal Brompton Hospital - Adults                      | Dr Nick Simmonds           |
| Royal Brompton Hospital - Paediatrics                 | Professor Andrew Bush      |
| Royal Cornwall Hospital - Paediatrics                 | Dr Anne Prendiville        |
| Royal Derby Hospital - Paediatrics                    | Dr Nigel Ruggins           |
| Royal Devon & Exeter Hospital - Adults                | Dr Patrick Oades           |
| Royal Devon & Exeter Hospital - Paediatrics           | Dr Patrick Oades           |
| Royal Hospital for Sick Children - Paediatrics        | Professor Steve Cunningham |
| Royal Preston Hospital - Paediatrics                  | Dr Karnam Sugumar          |
| Royal Shrewsbury Hospital - Paediatrics               | Dr Martyn Rees             |
| Royal United Hospital - Paediatrics                   | Dr Rebecca Winterson       |
| Royal Victoria Infirmary - Adults                     | Dr Simon Doe               |
| Royal Victoria Infirmary - Paediatrics                | Dr Malcolm Brodie          |
| Salisbury District Hospital - Paediatrics             | Dr Robert Scott-Jupp       |
| Sheffield Children's Hospital - Paediatrics           | Dr Christopher Taylor      |
| Southampton General Hospital - Adults                 | Dr Mary Carroll            |
| Southampton General Hospital - Paediatrics            | Dr Julian Legg             |
| St James Hospital - Paediatrics                       | Dr Tim Lee                 |
| Torbay Hospital - Adults                              | Dr Lee Dobson              |
| Torbay Hospital - Paediatrics                         | Dr Atanu Mukherjee         |
| University Hospital North Staffordshire - Adults      | Professor Warren Lenny     |
| University Hospital North Staffordshire - Paediatrics | Professor Warren Lenny     |
| University Hospital of Wales - Adults                 | Dr Ian Ketchell            |
| University Hospital of Wales - Paediatrics            | Dr Julian Forton           |
| Walsgrave Hospital - Paediatrics                      | Dr Edward Simmonds         |
| Warrington Hospital - Paediatrics                     | Dr Christopher Bedford     |
| William Harvey Hospital - Paediatrics                 | Dr Ola Smith               |
| Wythenshawe Hospital - Adults                         | Dr Naveen Rao              |
| Wythenshawe Hospital - Paediatrics                    | Dr Naveen Rao              |
| York Teaching Hospital - Paediatrics                  | Dr Murray Wheeler          |

## Supplementary Appendix 1: Multiple imputation of missing resource utilisation data and utility values

Missing data was multiply imputed ( $m=25$ ) through the use of chained equations.<sup>1</sup> The data was assumed to be missing at random. To account for non-normality in the distributions of costs and HRQoL, predictive mean matching was used. Missing cost data was imputed at the level of the category (inpatient care, outpatient visits, A&E visits, primary care etc.) and total costs was passively imputed as a sum of the individual cost domains for those with missing data. For HRQoL, missing data was imputed for the utility score for each of the time-points and QALYs were passively calculated. Predictors within both the cost and HRQoL multiple imputation models were patients age, sex, treatment arm, costs at baseline.

To account for statistical uncertainty and the correlation between costs and patient outcomes, the data was bootstrap sampled with replacement 2,000 times.<sup>2</sup> For each bootstrap sample, missing data was imputed<sup>3</sup> and incremental measures of cost and outcome were calculated using regression-analysis, controlling for baseline HRQoL, age (measured in days) and treatment arm. The regression analysis used ordinary least squares accounting for the multiply imputed data through the use of Rubin's rules.<sup>4</sup> All regression analysis including bootstrapping and multiple imputation was conducted within Stata v.14.

### References

1. White IR, Royston P, Wood AM. Multiple imputation using chained equations: Issues and guidance for practice. *Stat Med* 2011;30(4):377-99.
2. Nixon RM, Wonderling D, Grieve RD. Non-parametric methods for cost-effectiveness analysis: the central limit theorem and the bootstrap compared. *Health Econ* 2010;19(3):316-33.
3. Schomaker M, Heumann C. Bootstrap inference when using multiple imputation. *Stat Med* 2018;37(14):2252-66.
4. Rubin DB, Schenker N. Multiple imputation in health-care databases: an overview and some applications. *Stat Med* 1991;10(4):585-98.

**Supplementary Table 1: Secondary care unit costs used within the analysis**

| <b>Outpatients</b>          | <b>Measurement</b> | <b>Unit cost</b> | <b>Source</b>                                | <b>Detail</b>                                                                              |
|-----------------------------|--------------------|------------------|----------------------------------------------|--------------------------------------------------------------------------------------------|
| Non consultant-led, adult   | Per visit          | £75              | NHS Reference costs 2016-2017 <sup>1</sup>   | Any non-paediatric outpatient, weighted average                                            |
| Non consultant-led, child   | Per visit          | £149             | NHS Reference costs 2016-2017 <sup>1</sup>   | Any paediatric outpatient, weighted average                                                |
| Consultant-led, adult       | Per visit          | £136             | NHS Reference costs 2016-2017 <sup>1</sup>   | Any non-paediatric outpatient, weighted average                                            |
| Consultant-led, child       | Per visit          | £196             | NHS Reference costs 2016-2017 <sup>1</sup>   | Any paediatric outpatient, weighted average                                                |
| Dietician                   | Per visit          | £37              | PSSRU 2010 [2]                               | With qualification and including direct care costs, inflated to 2016-2017 using HCHS index |
| Physiotherapist             | Per visit          | £49              | NHS Reference costs 2016-2017 <sup>1</sup> ] |                                                                                            |
| MDT, adult                  | Per visit          | £1,541           | NICE 2017 [3]                                | MDT-clinic, based on 250 adult patients per year, 6 visits per person per year             |
| MDT, child                  | Per visit          | £1,254           | NICE 2017 [3]                                | MDT-clinic, based on 250 child patients per year, 6 visits per person per year             |
| Radiology                   | Per visit          | £135             | NHS Reference costs 2016-2017 <sup>1</sup>   | Interventional Radiology                                                                   |
| Pharmacy                    | Per visit          |                  | PSSRU 2010 [2]                               | With qualification and including direct care costs, inflated to 2016-2017 using HCHS index |
| A&E, discharged             | Per visit          | £128             | NHS Reference costs 2016-2017 <sup>1</sup>   | Any A&E discharged, weighted average                                                       |
| A&E, admitted               | Per visit          | £221             | NHS Reference costs 2016-2017 [1]            | Any A&E admitted, weighted average                                                         |
| <b>Intervention</b>         |                    |                  |                                              |                                                                                            |
| Ceftazidime                 | Per vial           | £4.25 - £17.59   | BNF 2017 [4]                                 |                                                                                            |
| Tobramycin                  | Per vial           | £19              | BNF 2017 [4]                                 |                                                                                            |
| Ciprofloxacin               | Per tablet         | £0.80 - £1.20    | BNF 2017 [4]                                 |                                                                                            |
| <b>Inpatient ward stays</b> |                    |                  |                                              |                                                                                            |
| General ward, adult         | Per diem           | £380             | NHS Reference costs 2016-2017 <sup>1</sup>   | Excess bed days, weighted average for adults                                               |

|                     |          |      |                                            |                                                  |
|---------------------|----------|------|--------------------------------------------|--------------------------------------------------|
| General ward, child | Per diem | £595 | NHS Reference costs 2016-2017 <sup>1</sup> | Excess bed day, weighted average for paediatrics |
|---------------------|----------|------|--------------------------------------------|--------------------------------------------------|

#### References

1. National Schedule of Reference Costs 2016-2017. London, UK: Department of Health; 2-17.
2. Curtis L. Unit costs and social care. Personal Social Services Research Unit, University of Kent, Canterbury, 2010.
3. Cystic Fibrosis: diagnosis and management; Appendix K. London, UK: National Institute for Health and Care Excellence; 2017.
4. British National Formulary. Joint Formulary Committee; London, UK: BMJ Group and Pharmaceutical Press; 2017.

### Supplementary Table 2: Unit costs in primary care or community care

|                                     | Measurement    | Unit cost | Source                                     | Detail                                                                                     |
|-------------------------------------|----------------|-----------|--------------------------------------------|--------------------------------------------------------------------------------------------|
| <b>Primary care</b>                 |                |           |                                            |                                                                                            |
| GP visit in surgery                 | Per visit      | £38       | PSSRU 2017 <sup>1</sup>                    | With qualification and including direct care costs                                         |
| Nurse visit in surgery              | Per visit      | £14       | PSSRU 2017 <sup>1</sup>                    | With qualifications and including direct care costs. Assuming 20 minutes consultation      |
| Doctor in walk-in centre            | Per visit      | £44       | NHS Reference costs 2016-2017 <sup>2</sup> | Weighted average of non-admitted, Type 4 A&E visits                                        |
| Nurse in walk-in centre             | Per visit      | £44       | NHS Reference costs 2016-2017 <sup>2</sup> | Weighted average of non-admitted, Type 4 A&E visits                                        |
| Other                               | Per visit      | £35       |                                            | Average of above                                                                           |
| <b>Home Visits</b>                  |                |           |                                            |                                                                                            |
| GP visit                            | Per home visit | £161      | PSSRU 2017 <sup>1</sup>                    | With qualification and including direct care costs, assuming 40 minutes with travel        |
| District Nurse                      | Per home visit | £29       | PSSRU 2010 <sup>3</sup>                    | With qualification and including direct care costs, inflated to 2016-2017 using HCHS index |
| Health Visitor                      | Per home visit | £58       | PSSRU 2010 <sup>3</sup>                    | With qualification and including direct care costs, inflated to 2016-2017 using HCHS index |
| Nurse                               | Per home visit | £44       | PSSRU 2010 <sup>3</sup>                    | With qualification and including direct care costs, inflated to 2016-2017 using HCHS index |
| Physiotherapist                     | Per home visit | £61       | PSSRU 2010 <sup>3</sup>                    | With qualification and including direct care costs, inflated to 2016-2017 using HCHS index |
| Occupational therapy                | Per home visit | £45       | PSSRU 2017 <sup>1</sup>                    | With qualification and including direct care costs                                         |
| Other                               | Per home visit | £47       |                                            | Average of all apart from GP visit                                                         |
| <b>Community based professional</b> |                |           |                                            |                                                                                            |
| Home care work                      | Per visit      | £21       | PSSRU 2017 <sup>1</sup>                    | With qualification and including direct care costs, 1 hour                                 |
| Nurse                               | Per visit      | £44       |                                            | Same as nurse home visit                                                                   |
| Physiotherapist                     | Per visit      | £49       |                                            | Same as physiotherapist home visit                                                         |
| Social worker                       | Per visit      | £57       | PSSRU 2017 <sup>1</sup>                    | With qualification and including direct care costs                                         |

#### References

1. Curtis L, Burns A. *Unit Costs of Health and Social Care 2017*. Personal Social Services Research Unit, University of Kent, Canterbury, 2017.
2. National Schedule of Reference Costs 2016-2017. London, UK: Department of Health; 2-17.
3. Curtis L. Unit costs and social care. Personal Social Services Research Unit, University of Kent, Canterbury, 2010.

**Supplementary Table 3: Societal unit costs**

|                                   | Measurement       | Unit cost | Source                                       | Detail                                                                                                                            |
|-----------------------------------|-------------------|-----------|----------------------------------------------|-----------------------------------------------------------------------------------------------------------------------------------|
| <b>Patient Aids</b>               |                   |           |                                              |                                                                                                                                   |
| Anti-allergy pillow               | Per item          | £11       | Wilko <sup>1</sup>                           |                                                                                                                                   |
| Anti-allergy bed covers           | Per item          | £8        | Wilko <sup>2</sup>                           |                                                                                                                                   |
| Peak flow medicine                | Per item          | £5        | BNF 2017 <sup>3</sup>                        |                                                                                                                                   |
| <b>Travel costs</b>               |                   |           |                                              |                                                                                                                                   |
| Car                               | Per minute        | £0.23     | AA <sup>4</sup>                              | Based on the motoring costs per mile for domestic purposes                                                                        |
| Bus                               | Per minute        | £0.08     | Department for Transport <sup>5</sup>        | Local bus transport statistics reported. 3.5 miles per journey                                                                    |
| Taxi                              | Per minute        | £0.53     | Local authority average                      | Assumption (based on average of Glasgow, <sup>6</sup> Liverpool, <sup>7</sup> Manchester <sup>8</sup> and Plymouth <sup>9</sup> ) |
| <b>Time lost from work</b>        |                   |           |                                              |                                                                                                                                   |
| Carer / patient time              | Per hour          | £17       | Office for National Statistics <sup>10</sup> | Work per minute using the mean hourly earnings reported by the Office of National Statistics                                      |
| <b>Over the counter medicines</b> |                   |           |                                              |                                                                                                                                   |
| Various                           | Per medicine/pill | Various   | BNF 2017 <sup>3</sup>                        |                                                                                                                                   |

References

1. Anti allergy pillow. <https://www.wilko.com/wilko-anti-allergy-medium-support-pillows-2pk/p/0478243> (accessed 31/07/2019).
2. Anti allergy bed covers. <https://www.wilko.com/en-uk/wilko-king-size-anti-allergy-mattress-protector/p/0324832> (accessed 31/07/2019).
3. British National Formulary. Joint Formulary Committee; London, UK: BMJ Group and Pharmaceutical Press; 2017.
4. The NHS Staff Council. Pay Circular (AforC) 3/2014: amendment number 32. Annex 12: Motoring costs. <https://www.nhsemployers.org/employershandbook/Annex-12-Motoring-costs.pdf> (accessed 31/07/2019).
5. Department for Transport. Costs, fares and revenue (BUS04). <https://www.gov.uk/government/statistical-data-sets/bus04-costs-fares-and-revenue> (accessed 31/07/2019).
6. Glasgow taxi. <https://www2.gov.scot/Topics/Government/Procurement/Selling/taxiglasgow> (accessed 31/07/2019).
7. Liverpool taxi. <https://liverpool.gov.uk/media/9294/tariff-sheet-2018.pdf> (accessed 31/07/2019).
8. Manchester taxi. [https://secure.manchester.gov.uk/downloads/download/3399/hackney\\_carriage\\_vehicle\\_fare\\_card\\_2011\\_2012](https://secure.manchester.gov.uk/downloads/download/3399/hackney_carriage_vehicle_fare_card_2011_2012) (accessed 31/07/2019).
9. Plymouth taxi. <https://www.plymouth.gov.uk/parkingandtravel/publictransport/taxis> (accessed 31/07/2019).
10. ONS employment. <https://www.ons.gov.uk/employmentandlabourmarket/peopleinwork/earningsandworkinghours/datasets/ashe1997to2015selectedestimates> (accessed 31/07/2019).

**Supplementary Table 4: Cystic Fibrosis Specialty HRG costs**

|                                     | Measurement | Unit cost | Source                             |
|-------------------------------------|-------------|-----------|------------------------------------|
| Band 1 adults 17 years and over     | Per year    | £3,362    | NHS Reference costs 2016-2017 [39] |
| Band 1A adults 17 years and over    | Per year    | £5,380    | NHS Reference costs 2016-2017      |
| Band 1A children 16 years and under | Per year    | £5,778    | NHS Reference costs 2016-2017      |
| Band 1 children 16 years and under  | Per year    | £5,685    | NHS Reference costs 2016-2017      |
| Band 2 adults 17 years and over     | Per year    | £6,498    | NHS Reference costs 2016-2017      |
| Band 2A adults 17 years and over    | Per year    | £8,922    | NHS Reference costs 2016-2017      |
| Band 2A children 16 years and under | Per year    | £8,968    | NHS Reference costs 2016-2017      |
| Band 2 children 16 years and under  | Per year    | £7,492    | NHS Reference costs 2016-2017      |
| Band 3 adults 17 years and over     | Per year    | £15,337   | NHS Reference costs 2016-2017      |
| Band 3 children 16 years and under  | Per year    | £16,770   | NHS Reference costs 2016-2017      |

## References

1. National Schedule of Reference Costs 2016-2017. London, UK: Department of Health; 2-17.

**Supplementary Table 5: Types of samples that confirmed participants had re-isolated *P. aeruginosa***

| Sample type                            | IV antibiotic therapy (N=62) | Oral antibiotic therapy (N=70) |
|----------------------------------------|------------------------------|--------------------------------|
| Bronchoscopy Lavage (BAL) & Cough swab | 1 (1.4%)                     | 0 (0%)                         |
| Cough plate                            | 3 (4.3%)                     | 2 (3.2%)                       |
| Cough swab                             | 44 (62.9%)                   | 37 (59.7%)                     |
| Cough swab & Sputum sample             | 0 (0%)                       | 1 (1.6%)                       |
| Nose swab                              | 1 (1.4%)                     | 0 (0%)                         |
| Sputum sample (not induced)            | 18 (25.7%)                   | 20 (32.3%)                     |
| Sputum sample (induced)                | 0 (0%)                       | 1 (1.6%)                       |
| Throat swab                            | 1 (1.4%)                     | 1 (1.6%)                       |
| Other type                             | 2 (2.9%)                     | 0 (0%)                         |

**Supplementary Table 6: Samples that were resistant to any of the study drugs at re-isolation**

| Resistant to  | IV antibiotic therapy (N=62) | Oral antibiotic therapy (N=70) |
|---------------|------------------------------|--------------------------------|
| Ceftazidime   | 0 (0%)                       | 1 (1.6%)                       |
| Tobramycin    | 1 (1.4%)                     | 0 (0%)                         |
| Ciprofloxacin | 1 (1.4%)                     | 2 (3.2%)                       |
| Colistin      | 0 (0%)                       | 0 (0%)                         |



**Supplementary Table 7: Analyses of primary outcome**

| Analysis                                                                                                                                                                            | IV antibiotic therapy | Oral antibiotic therapy | Relative risk (95% CI) | p-value |
|-------------------------------------------------------------------------------------------------------------------------------------------------------------------------------------|-----------------------|-------------------------|------------------------|---------|
| Primary outcome: successful eradication of <i>P. aeruginosa</i> 3 months after treatment commencement and remaining infection free to 15 months                                     |                       |                         |                        |         |
| Primary analysis                                                                                                                                                                    | 55/125 (44%)          | 68/130 (52.3%)          | 0.84 (0.65, 1.09)      | 0.18    |
| Sensitivity analysis 1: All patients followed up past 3 months with no 15 month sample classified as success                                                                        | 66/136 (48.5%)        | 85/144 (56.9%)          | 0.85 (0.68, 1.07)      | 0.16    |
| Sensitivity analysis 2: All patients followed up past 3 months with no 15 month sample classified as failure                                                                        | 55/136 (40.4%)        | 68/144 (47.2%)          | 0.86 (0.66, 1.12)      | 0.25    |
| Sensitivity analysis 3: All patients followed up past 3 months with no 15 month sample classified as success/failure in accordance with the next sample taken after 15 month window | 66/136 (48.5%)        | 81/144 (56.3%)          | 0.86 (0.69, 1.08)      | 0.20    |
| Sensitivity analysis 4: As primary analysis but 3 and 15 month windows extended to -4 weeks/+10 weeks*                                                                              | 61/132 (46.2%)        | 73/139 (52.5%)          | 0.88 (0.69, 1.12)      | 0.30    |
| Sensitivity analysis 5: As per primary analysis but 15-month window removed (any sample after 3-month window included)*                                                             | 58/136 (42.7%)        | 70/144 (48.6%)          | 0.88 (0.68, 1.13)      | 0.32    |

Date are n/N (%), unless otherwise indicated

\*Post hoc analysis

**Supplementary Table 8: Analyses of secondary outcome 'Time to reoccurrence of original *P. aeruginosa* infection'**

| Analysis                                                                                                              | IV antibiotic therapy N=137 | Oral antibiotic therapy N=148 | Hazard ratio (95% CI) | p-value |
|-----------------------------------------------------------------------------------------------------------------------|-----------------------------|-------------------------------|-----------------------|---------|
| Time to reoccurrence of original <i>P. aeruginosa</i> infection – unknown strains assumed to be the same as baseline  |                             |                               |                       |         |
| Time from randomisation                                                                                               | 74 (54.0%)                  | 66 (44.6%)                    | 1.37 (0.99, 1.91)     | 0.06    |
| Time from treatment commencement                                                                                      | 74 (54.0%)                  | 66 (44.6%)                    | 1.38 (0.99, 1.92)     | 0.06    |
| Time to reoccurrence of original <i>P. aeruginosa</i> infection – unknown strains assumed to be different to baseline |                             |                               |                       |         |
| Time from randomisation                                                                                               | 21 (15.3%)                  | 14 (9.5%)                     | 1.85 (0.94, 3.64)     | 0.08    |
| Time from treatment commencement                                                                                      | 21 (15.3%)                  | 14 (9.5%)                     | 1.85 (0.94, 3.64)     | 0.07    |

Date are n (%) for participants experiencing reoccurrence of the original *P. aeruginosa* infection, unless otherwise indicated

**Supplementary Table 9: Analyses of secondary outcome 'Re-infection with a different and distinct genotype of *P. aeruginosa*'**

| IV antibiotic therapy N=25 | Oral antibiotic therapy N=17 | Relative risk (95% CI) | p-value |
|----------------------------|------------------------------|------------------------|---------|
| 6 (24.0%)                  | 5 (29.4%)                    | 0.82 (0.30, 2.25)      | 0.73    |

Date are n (%), unless otherwise indicated

**Supplementary Table 10: Number of participants with an additional organism of interest during 15 months post randomisation**

| Organism                                          | Intravenous antibiotic therapy N=137 | Oral antibiotic therapy N=148 |
|---------------------------------------------------|--------------------------------------|-------------------------------|
| <i>Staphylococcus aureus</i>                      | 51 (37.2%)                           | 53 (35.8%)                    |
| <i>Haemophilus influenza</i>                      | 36 (26.3%)                           | 32 (21.6%)                    |
| <i>Mycobacterium abscessus</i>                    | 0 (0%)                               | 1 (0.7%)                      |
| <i>Mycobacterium avium intracellulare complex</i> | 0 (0%)                               | 0 (0%)                        |
| Other non-tuberculous mycobacteria                | 0 (0%)                               | 0 (0%)                        |
| <i>Stenotrophomonas maltophilia</i>               | 6 (4.4%)                             | 9 (6.1%)                      |
| <i>Achromobacter xylosoxidans</i>                 | 1 (0.7%)                             | 3 (20.0%)                     |

Data are n (%), unless otherwise indicated

**Supplementary Table 11: Estimates from random effects models for CFQ-R**

| Domain                     | N   | Mean treatment difference at 15 months (95% CI) | p-value |
|----------------------------|-----|-------------------------------------------------|---------|
| Self-report questionnaire  |     |                                                 |         |
| Physical functioning       | 106 | -3.63 (-10.41, 3.16)                            | 0.29    |
| Role/school functioning*   | 27  | 7.66 (-6.21, 21.52)                             | 0.27    |
| Vitality*                  | 27  | 5.4 (-6.88, 17.69)                              | 0.37    |
| Emotional functioning      | 106 | -1.59 (-7.39, 4.22)                             | 0.59    |
| Social functioning         | 106 | 2.11 (-4.03, 8.25)                              | 0.50    |
| Body image                 | 105 | -4.01 (-11.78, 3.77)                            | 0.31    |
| Eating problems            | 106 | -0.39 (-6.78, 6)                                | 0.90    |
| Treatment burden           | 105 | 2.86 (-6.19, 11.92)                             | 0.53    |
| Health perceptions*        | 27  | 5.06 (-13.72, 23.84)                            | 0.58    |
| Weight*                    | 27  | 1.4 (-19.02, 21.83)                             | 0.89    |
| Respiratory symptoms       | 106 | 2.82 (-3.44, 9.08)                              | 0.37    |
| Digestive symptoms         | 106 | -0.01 (-9.95, 9.93)                             | 0.99    |
| Parent/carer questionnaire |     |                                                 |         |
| Physical functioning       | 73  | -5.17 (-13.55, 3.22)                            | 0.22    |
| Role/school functioning    | 72  | -1.47 (-10.22, 7.28)                            | 0.74    |
| Vitality                   | 72  | -0.44 (-9.36, 8.48)                             | 0.92    |
| Emotional functioning      | 72  | 3.32 (-3.56, 10.2)                              | 0.34    |
| Body image                 | 72  | -0.56 (-12.03, 10.9)                            | 0.92    |
| Eating problems            | 72  | 6.15 (-2.78, 15.08)                             | 0.17    |
| Treatment burden           | 73  | -0.28 (-11.25, 10.69)                           | 0.96    |
| Health perceptions         | 72  | -7.25 (-15.09, 0.6)                             | 0.07    |
| Weight                     | 73  | -1.19 (-17.63, 15.26)                           | 0.89    |
| Respiratory symptoms       | 73  | -3.33 (-11.71, 9.93)                            | 0.43    |
| Digestive symptoms         | 72  | 3.54 (-4.9, 11.98)                              | 0.41    |

\*: Only asked in participants aged 14 and over

**Supplementary Table 12: Median number of days' absence during the 15 months following randomisation for carer and participant (absenteeism from education or work)**

|             | Treatment               | N   | Median | IQR     | Min, Max | p-value |
|-------------|-------------------------|-----|--------|---------|----------|---------|
| Carer       | IV antibiotic therapy   | 131 | 0      | (0,1)   | 0,24     | 0.62    |
|             | Oral antibiotic therapy | 139 | 0      | (0,1)   | 0,98     |         |
| Participant | IV antibiotic therapy   | 131 | 0      | (0,6-2) | 0,56     | 0.26    |
|             | Oral antibiotic therapy | 140 | 1      | (0,10)  | 0,113    |         |

**Supplementary Table 13: All non-serious adverse events**

| Preferred Term                                                   | IV Antibiotic Therapy<br>N=126 |            | Oral Antibiotic Therapy<br>N=146 |            | Total<br>N=272 |             |
|------------------------------------------------------------------|--------------------------------|------------|----------------------------------|------------|----------------|-------------|
|                                                                  | Events                         | Patients   | Events                           | Patients   | Events         | Patients    |
| Any non-serious adverse event <sup>ab</sup>                      | 126                            | 60 (47.6%) | 136                              | 72(49.3%)  | 262            | 132 (48.5%) |
| Cough                                                            | 26                             | 22 (17.5%) | 28                               | 23 (15.8%) | 54             | 45 (16.5%)  |
| Upper respiratory tract infection                                | 15                             | 11 (8.7%)  | 3                                | 2 (1.4%)   | 18             | 13 (4.8%)   |
| Productive cough                                                 | 5                              | 5 (4%)     | 8                                | 8 (5.5%)   | 13             | 13 (4.8%)   |
| Diarrhoea                                                        | 6                              | 5 (4%)     | 3                                | 3 (2.1%)   | 9              | 8 (2.9%)    |
| Pyrexia                                                          | 2                              | 2 (1.6%)   | 7                                | 7 (4.8%)   | 9              | 9 (3.3%)    |
| Wheezing                                                         | 3                              | 3 (2.4%)   | 6                                | 6 (4.1%)   | 9              | 9 (3.3%)    |
| Infective pulmonary exacerbation of cystic fibrosis <sup>b</sup> | 4                              | 3 (2.4%)   | 3                                | 3 (2.1%)   | 7              | 6 (2.2%)    |

| Preferred Term                                                   | IV Antibiotic Therapy<br>N=126 |          | Oral Antibiotic Therapy<br>N=146 |          | Total<br>N=272 |          |
|------------------------------------------------------------------|--------------------------------|----------|----------------------------------|----------|----------------|----------|
|                                                                  | Events                         | Patients | Events                           | Patients | Events         | Patients |
| Candida infection                                                | 1                              | 1 (0.8%) | 5                                | 5 (3.4%) | 6              | 6 (2.2%) |
| Distal intestinal obstruction syndrome                           | 2                              | 2 (1.6%) | 3                                | 3 (2.1%) | 5              | 5 (1.8%) |
| Varicella                                                        | 3                              | 3 (2.4%) | 1                                | 1 (0.7%) | 4              | 4 (1.5%) |
| Abdominal pain                                                   | 1                              | 1 (0.8%) | 2                                | 2 (1.4%) | 3              | 3 (1.1%) |
| Arthralgia                                                       | 0                              | 0 (0%)   | 3                                | 3 (2.1%) | 3              | 3 (1.1%) |
| Epistaxis                                                        | 1                              | 1 (0.8%) | 2                                | 2 (1.4%) | 3              | 3 (1.1%) |
| Fall                                                             | 1                              | 1 (0.8%) | 2                                | 2 (1.4%) | 3              | 3 (1.1%) |
| <i>Haemophilus influenzae</i> respiratory infection <sup>c</sup> | 3                              | 3 (2.4%) | 0                                | 0 (0%)   | 3              | 3 (1.1%) |
| Headache                                                         | 3                              | 2 (1.6%) | 0                                | 0 (0%)   | 3              | 2 (0.7%) |
| Pulmonary function decreased <sup>c</sup>                        | 1                              | 1 (0.8%) | 2                                | 2 (1.4%) | 3              | 3 (1.1%) |
| Rash                                                             | 2                              | 2 (1.6%) | 1                                | 1 (0.7%) | 3              | 3 (1.1%) |
| Respiratory tract infection                                      | 1                              | 1 (0.8%) | 2                                | 2 (1.4%) | 3              | 3 (1.1%) |
| Vomiting                                                         | 3                              | 3 (2.4%) | 0                                | 0 (0%)   | 3              | 3 (1.1%) |
| Abdominal pain upper                                             | 1                              | 1 (0.8%) | 1                                | 1 (0.7%) | 2              | 2 (0.7%) |
| Adverse drug reaction                                            | 1                              | 1 (0.8%) | 1                                | 1 (0.7%) | 2              | 2 (0.7%) |
| Bronchospasm                                                     | 1                              | 1 (0.8%) | 1                                | 1 (0.7%) | 2              | 2 (0.7%) |
| Chest pain                                                       | 1                              | 1 (0.8%) | 1                                | 1 (0.7%) | 2              | 2 (0.7%) |
| Constipation                                                     | 1                              | 1 (0.8%) | 1                                | 1 (0.7%) | 2              | 2 (0.7%) |
| Dermatitis diaper                                                | 1                              | 1 (0.8%) | 1                                | 1 (0.7%) | 2              | 2 (0.7%) |
| Device occlusion                                                 | 2                              | 2 (1.6%) | 0                                | 0 (0%)   | 2              | 2 (0.7%) |
| Dizziness                                                        | 1                              | 1 (0.8%) | 1                                | 1 (0.7%) | 2              | 2 (0.7%) |
| Ear pain                                                         | 0                              | 0 (0%)   | 2                                | 2 (1.4%) | 2              | 2 (0.7%) |
| Nausea                                                           | 1                              | 1 (0.8%) | 1                                | 1 (0.7%) | 2              | 2 (0.7%) |
| Pain                                                             | 1                              | 1 (0.8%) | 1                                | 1 (0.7%) | 2              | 2 (0.7%) |
| Seasonal allergy                                                 | 1                              | 1 (0.8%) | 1                                | 1 (0.7%) | 2              | 2 (0.7%) |
| Viral infection                                                  | 1                              | 1 (0.8%) | 1                                | 1 (0.7%) | 2              | 2 (0.7%) |
| Vulvovaginal candidiasis                                         | 2                              | 2 (1.6%) | 0                                | 0 (0%)   | 2              | 2 (0.7%) |
| Administration site bruise                                       | 1                              | 1 (0.8%) | 0                                | 0 (0%)   | 1              | 1 (0.4%) |
| Administration site pain                                         | 1                              | 1 (0.8%) | 0                                | 0 (0%)   | 1              | 1 (0.4%) |
| Alanine aminotransferase increased                               | 1                              | 1 (0.8%) | 0                                | 0 (0%)   | 1              | 1 (0.4%) |
| Allergic bronchopulmonary aspergillosis (ABPA) <sup>c</sup>      | 0                              | 0 (0%)   | 1                                | 1 (0.7%) | 1              | 1 (0.4%) |
| Back pain                                                        | 1                              | 1 (0.8%) | 0                                | 0 (0%)   | 1              | 1 (0.4%) |
| Blood glucose increased                                          | 1                              | 1 (0.8%) | 0                                | 0 (0%)   | 1              | 1 (0.4%) |
| Catheter site related reaction                                   | 1                              | 1 (0.8%) | 0                                | 0 (0%)   | 1              | 1 (0.4%) |
| Chest infection <sup>c</sup>                                     | 0                              | 0 (0%)   | 1                                | 1 (0.7%) | 1              | 1 (0.4%) |
| Chest X-ray abnormal                                             | 0                              | 0 (0%)   | 1                                | 1 (0.7%) | 1              | 1 (0.4%) |
| Conjunctivitis                                                   | 1                              | 1 (0.8%) | 0                                | 0 (0%)   | 1              | 1 (0.4%) |
| Decreased appetite                                               | 0                              | 0 (0%)   | 1                                | 1 (0.7%) | 1              | 1 (0.4%) |
| Dry skin                                                         | 1                              | 1 (0.8%) | 0                                | 0 (0%)   | 1              | 1 (0.4%) |
| Dysuria                                                          | 0                              | 0 (0%)   | 1                                | 1 (0.7%) | 1              | 1 (0.4%) |
| Ear discomfort                                                   | 1                              | 1 (0.8%) | 0                                | 0 (0%)   | 1              | 1 (0.4%) |
| Eczema                                                           | 1                              | 1 (0.8%) | 0                                | 0 (0%)   | 1              | 1 (0.4%) |
| Eczema infected                                                  | 0                              | 0 (0%)   | 1                                | 1 (0.7%) | 1              | 1 (0.4%) |
| <i>Enterobacter cloacae</i> respiratory infection <sup>c</sup>   | 1                              | 1 (0.8%) | 0                                | 0 (0%)   | 1              | 1 (0.4%) |
| Enuresis                                                         | 0                              | 0 (0%)   | 1                                | 1 (0.7%) | 1              | 1 (0.4%) |

| Preferred Term                                                                  | IV Antibiotic Therapy<br>N=126 |          | Oral Antibiotic Therapy<br>N=146 |          | Total<br>N=272 |          |
|---------------------------------------------------------------------------------|--------------------------------|----------|----------------------------------|----------|----------------|----------|
|                                                                                 | Events                         | Patients | Events                           | Patients | Events         | Patients |
| Eye infection                                                                   | 1                              | 1 (0.8%) | 0                                | 0 (0%)   | 1              | 1 (0.4%) |
| Febrile convulsion                                                              | 0                              | 0 (0%)   | 1                                | 1 (0.7%) | 1              | 1 (0.4%) |
| Flank pain                                                                      | 0                              | 0 (0%)   | 1                                | 1 (0.7%) | 1              | 1 (0.4%) |
| Gastroenteritis                                                                 | 0                              | 0 (0%)   | 1                                | 1 (0.7%) | 1              | 1 (0.4%) |
| Haematemesis                                                                    | 0                              | 0 (0%)   | 1                                | 1 (0.7%) | 1              | 1 (0.4%) |
| <i>Haemophilus parainfluenza</i> respiratory infection <sup>c</sup>             | 1                              | 1 (0.8%) | 0                                | 0 (0%)   | 1              | 1 (0.4%) |
| Haemoptysis                                                                     | 1                              | 1 (0.8%) | 0                                | 0 (0%)   | 1              | 1 (0.4%) |
| Hand, foot and mouth disease (recorded as foot and mouth disease) <sup>cd</sup> | 0                              | 0 (0%)   | 1                                | 1 (0.7%) | 1              | 1 (0.4%) |
| Hand, foot and mouth disease <sup>c</sup>                                       | 0                              | 0 (0%)   | 1                                | 1 (0.7%) | 1              | 1 (0.4%) |
| Infectious mononucleosis                                                        | 0                              | 0 (0%)   | 1                                | 1 (0.7%) | 1              | 1 (0.4%) |
| Influenza like illness                                                          | 0                              | 0 (0%)   | 1                                | 1 (0.7%) | 1              | 1 (0.4%) |
| <i>Klebsiella pneumoniae</i> respiratory infection <sup>c</sup>                 | 0                              | 0 (0%)   | 1                                | 1 (0.7%) | 1              | 1 (0.4%) |
| Lethargy                                                                        | 0                              | 0 (0%)   | 1                                | 1 (0.7%) | 1              | 1 (0.4%) |
| Limb discomfort                                                                 | 1                              | 1 (0.8%) | 0                                | 0 (0%)   | 1              | 1 (0.4%) |
| Malaise                                                                         | 0                              | 0 (0%)   | 1                                | 1 (0.7%) | 1              | 1 (0.4%) |
| Malignant melanoma                                                              | 0                              | 0 (0%)   | 1                                | 1 (0.7%) | 1              | 1 (0.4%) |
| Migraine                                                                        | 0                              | 0 (0%)   | 1                                | 1 (0.7%) | 1              | 1 (0.4%) |
| Musculoskeletal chest pain                                                      | 0                              | 0 (0%)   | 1                                | 1 (0.7%) | 1              | 1 (0.4%) |
| Musculoskeletal stiffness                                                       | 0                              | 0 (0%)   | 1                                | 1 (0.7%) | 1              | 1 (0.4%) |
| Myalgia                                                                         | 0                              | 0 (0%)   | 1                                | 1 (0.7%) | 1              | 1 (0.4%) |
| <i>Mycobacterium avium</i> complex infection <sup>c</sup>                       | 0                              | 0 (0%)   | 1                                | 1 (0.7%) | 1              | 1 (0.4%) |
| Nasal congestion                                                                | 1                              | 1 (0.8%) | 0                                | 0 (0%)   | 1              | 1 (0.4%) |
| Nasal swelling <sup>c</sup>                                                     | 0                              | 0 (0%)   | 1                                | 1 (0.7%) | 1              | 1 (0.4%) |
| Nasal vestibulitis                                                              | 1                              | 1 (0.8%) | 0                                | 0 (0%)   | 1              | 1 (0.4%) |
| Nasopharyngitis                                                                 | 1                              | 1 (0.8%) | 0                                | 0 (0%)   | 1              | 1 (0.4%) |
| Onychoclasia                                                                    | 1                              | 1 (0.8%) | 0                                | 0 (0%)   | 1              | 1 (0.4%) |
| Oral candidiasis                                                                | 0                              | 0 (0%)   | 1                                | 1 (0.7%) | 1              | 1 (0.4%) |
| Otitis media                                                                    | 1                              | 1 (0.8%) | 0                                | 0 (0%)   | 1              | 1 (0.4%) |
| Pain in extremity                                                               | 0                              | 0 (0%)   | 1                                | 1 (0.7%) | 1              | 1 (0.4%) |
| Pancreatitis                                                                    | 1                              | 1 (0.8%) | 0                                | 0 (0%)   | 1              | 1 (0.4%) |
| Paraesthesia oral                                                               | 0                              | 0 (0%)   | 1                                | 1 (0.7%) | 1              | 1 (0.4%) |
| Petechiae                                                                       | 0                              | 0 (0%)   | 1                                | 1 (0.7%) | 1              | 1 (0.4%) |
| Pharyngeal oedema                                                               | 0                              | 0 (0%)   | 1                                | 1 (0.7%) | 1              | 1 (0.4%) |
| Photosensitivity reaction                                                       | 0                              | 0 (0%)   | 1                                | 1 (0.7%) | 1              | 1 (0.4%) |
| Pneumonia                                                                       | 1                              | 1 (0.8%) | 0                                | 0 (0%)   | 1              | 1 (0.4%) |
| Polyuria                                                                        | 1                              | 1 (0.8%) | 0                                | 0 (0%)   | 1              | 1 (0.4%) |
| Rectal haemorrhage                                                              | 0                              | 0 (0%)   | 1                                | 1 (0.7%) | 1              | 1 (0.4%) |
| Sinusitis                                                                       | 1                              | 1 (0.8%) | 0                                | 0 (0%)   | 1              | 1 (0.4%) |
| Skin discolouration                                                             | 0                              | 0 (0%)   | 1                                | 1 (0.7%) | 1              | 1 (0.4%) |
| Skull fracture                                                                  | 0                              | 0 (0%)   | 1                                | 1 (0.7%) | 1              | 1 (0.4%) |
| Sputum increased                                                                | 1                              | 1 (0.8%) | 0                                | 0 (0%)   | 1              | 1 (0.4%) |
| <i>Stenotrophomonas maltophilia</i> respiratory infection <sup>c</sup>          | 0                              | 0 (0%)   | 1                                | 1 (0.7%) | 1              | 1 (0.4%) |
| <i>Streptococcus pyogenes</i> respiratory infection <sup>c</sup>                | 0                              | 0 (0%)   | 1                                | 1 (0.7%) | 1              | 1 (0.4%) |
| Sunburn                                                                         | 0                              | 0 (0%)   | 1                                | 1 (0.7%) | 1              | 1 (0.4%) |
| Tendonitis                                                                      | 0                              | 0 (0%)   | 1                                | 1 (0.7%) | 1              | 1 (0.4%) |
| Tongue discolouration                                                           | 1                              | 1 (0.8%) | 0                                | 0 (0%)   | 1              | 1 (0.4%) |
| Urinary tract infection                                                         | 1                              | 1 (0.8%) | 0                                | 0 (0%)   | 1              | 1 (0.4%) |

| Preferred Term       | IV Antibiotic Therapy<br>N=126 |          | Oral Antibiotic Therapy<br>N=146 |          | Total<br>N=272 |          |
|----------------------|--------------------------------|----------|----------------------------------|----------|----------------|----------|
|                      | Events                         | Patients | Events                           | Patients | Events         | Patients |
| Urticaria            | 0                              | 0 (0%)   | 1                                | 1 (0.7%) | 1              | 1 (0.4%) |
| Vitamin A deficiency | 0                              | 0 (0%)   | 1                                | 1 (0.7%) | 1              | 1 (0.4%) |
| Vitamin D deficiency | 0                              | 0 (0%)   | 1                                | 1 (0.7%) | 1              | 1 (0.4%) |
| Vitamin E deficiency | 0                              | 0 (0%)   | 1                                | 1 (0.7%) | 1              | 1 (0.4%) |
| Wrist fracture       | 1                              | 1 (0.8%) | 0                                | 0 (0%)   | 1              | 1 (0.4%) |

Data are n or n (%).

<sup>a</sup> 9 additional adverse events were reported by 9 participants in the IV antibiotic therapy group and 5 adverse events from 5 participants in the oral antibiotic therapy group but have not been included here as they were the event of interest for the primary outcome so should not have been reported as an adverse event.

<sup>b</sup> 3 additional adverse events were reported by 3 participants in the oral antibiotic therapy group but have not been included here as they contributed to the analysis of the outcome 'Number of pulmonary exacerbations'.

<sup>c</sup> Wording not consistent with 'preferred term' recorded on database, amended based on additional data available.

<sup>d</sup> Not confirmed in medical notes

<sup>e</sup> Not reported on the microbiology CRF for the sample taken on the date of onset so not included in Supplementary Table 10.

**Supplementary Table 14: Mean unadjusted costs based on 15-month time horizon and outcomes between trial arms based on multiply imputed data (imputations=25)**

|                                               | Intravenous antibiotic therapy (IVT), mean value, (standard error)<br><br>(n=125) | Oral antibiotic therapy (OT), mean value, (standard error)<br><br>(n=130) | Incremental (OT - IVT)*           |
|-----------------------------------------------|-----------------------------------------------------------------------------------|---------------------------------------------------------------------------|-----------------------------------|
| <b>NHS resource use</b>                       |                                                                                   |                                                                           |                                   |
| A&E                                           | £24.15 (7.69)                                                                     | £23.79 (7.55)                                                             |                                   |
| Inpatients                                    | £1027.0 (338.0)                                                                   | £1682.4 (390.9)                                                           |                                   |
| Outpatients                                   | £1221.5 (121.0)                                                                   | £1414.0 (120.5)                                                           |                                   |
| Primary care                                  | £28.42 (10.92)                                                                    | £25.13 (6.48)                                                             |                                   |
| Home visits                                   | £185.1 (35.6)                                                                     | £172.0 (30.54)                                                            |                                   |
| Prescribed medicines                          | £124.3 (63.76)                                                                    | £248.2 (86.67)                                                            |                                   |
| Total costs (not including intervention)      | £2610.5 (401.3)                                                                   | £3565.4 (450.5)                                                           | 954.9 (95% CI:-132.1, 2041.9)     |
| Intervention cost                             | £7284.4 (242.0)                                                                   | £264.3 (124.1)                                                            | -7020.2 (95% CI:-7548.5, -6491.8) |
| Total NHS costs (including intervention)      | £9895.0 (472.2)                                                                   | £3829.7 (457.5)                                                           | -6065.3 (95% CI:-7287.1, -4843.4) |
| <b>Wider resource use</b>                     |                                                                                   |                                                                           |                                   |
| Patient/carer lost work                       | £7.67 (3.13)                                                                      | £1.88 (0.73)                                                              |                                   |
| Aids & Appliances                             | £8.77 (3.73)                                                                      | £11.13 (2.86)                                                             |                                   |
| Over counter medicine                         | £1.01 (0.301)                                                                     | £1.04 (0.212)                                                             |                                   |
| Travel costs                                  | £86.05 (22.17)                                                                    | £90.49 (18.01)                                                            |                                   |
| Total societal costs (plus intervention)      | £9998.5 (476.1)                                                                   | £3934.3 (462.0)                                                           | -6064.2 (95% CI:-7296.2, -4832.2) |
| <b>Outcomes</b>                               |                                                                                   |                                                                           |                                   |
| Primary outcome (% successful eradication)    | 0.44 (0.05)                                                                       | 0.52 (0.04)                                                               | 0.083 (95% CI:-0.040, 0.21)       |
| <i>Health related quality of life (HRQoL)</i> |                                                                                   |                                                                           |                                   |
| EQ5D baseline                                 | 0.820 (0.02)                                                                      | 0.873 (0.02)                                                              |                                   |
| EQ5D 3 months                                 | 0.854 (0.02)                                                                      | 0.893 (0.02)                                                              |                                   |
| EQ5D 15 months                                | 0.829 (0.03)                                                                      | 0.893 (0.02)                                                              |                                   |
| EQ5D 24 months                                | 0.895 (0.02)                                                                      | 0.923 (0.02)                                                              |                                   |
| Quality-adjusted life-years (over 15-months)  | 1.050 (0.02)                                                                      | 1.114 (0.02)                                                              | 0.063 (95% CI:0.0074, 0.12)       |
| Quality-adjusted life-years (over 24-months)  | 1.697 (0.03)                                                                      | 1.795 (0.03)                                                              | 0.098 (95% CI:0.013, 0.18)        |

\*Unadjusted for baseline characteristics, age and baseline HRQoL.

**Supplementary Table 15: NHS and PSS resource use and missingness data (over 15-months)**

|                            | <b>IV Antibiotic Therapy<br/>N=125</b> | <b>Oral Antibiotic<br/>Therapy<br/>N=130</b> |
|----------------------------|----------------------------------------|----------------------------------------------|
| <b>Secondary Care</b>      |                                        |                                              |
| A&E attendance, admitted   |                                        |                                              |
| 0 visits                   | 54 (91.5%)                             | 61 (88.4%)                                   |
| 1 visit                    | 3 (5.1%)                               | 8 (11.6%)                                    |
| 2 visits                   | 2 (3.4%)                               | 0 (0.0%)                                     |
| 3+ visits                  | 0 (0.0%)                               | 0 (0.0%)                                     |
| All Missing                | 66                                     | 61                                           |
| A&E attendance, discharged |                                        |                                              |
| 0 visits                   | 57 (96.6%)                             | 66 (95.7%)                                   |
| 1 visit                    | 1 (1.7%)                               | 2 (2.9%)                                     |
| 2 visits                   | 1 (1.7%)                               | 1 (1.4%)                                     |
| 3+ visits                  | 0 (0.0%)                               | 0 (0.0%)                                     |
| All Missing                | 66                                     | 61                                           |
| Inpatient stay             |                                        |                                              |
| 0 visits                   | 66 (80.5%)                             | 65 (72.2%)                                   |
| 1 visit                    | 11 (13.4%)                             | 19 (21.1%)                                   |
| 2 visits                   | 4 (4.9%)                               | 3 (3.3%)                                     |
| 3+ visits                  | 1 (1.2%)                               | 3 (3.3%)                                     |
| All Missing                | 43                                     | 40                                           |
| Outpatient (visits)        |                                        |                                              |
| 0 visits                   | 0 (0.0%)                               | 0 (0.0%)                                     |
| 1 visit                    | 28 (59.6%)                             | 29 (60.4%)                                   |
| 2 visits                   | 11 (23.4%)                             | 10 (20.8%)                                   |
| 3+ visits                  | 8 (17.0%)                              | 9 (18.8%)                                    |
| All Missing                | 78                                     | 82                                           |
| <b>Primary Care</b>        |                                        |                                              |
| GP at surgery              |                                        |                                              |
| 0 visits                   | 70 (82.4%)                             | 78 (81.3%)                                   |
| 1 visit                    | 11 (12.9%)                             | 10 (10.4%)                                   |
| 2 visits                   | 2 (2.4%)                               | 5 (5.2%)                                     |
| 3+ visits                  | 2 (2.4%)                               | 3 (3.1%)                                     |
| All Missing                | 40                                     | 34                                           |
| Doctor at walk-in centre   |                                        |                                              |
| 0 visits                   | 85 (100.0%)                            | 92 (95.8%)                                   |
| 1 visit                    | 0 (0.0%)                               | 3 (3.1%)                                     |
| 2 visits                   | 0 (0.0%)                               | 1 (1.0%)                                     |
| 3+ visits                  | 0 (0.0%)                               | 0 (0.0%)                                     |
| All Missing                | 40                                     | 34                                           |
| Nurse at surgery           |                                        |                                              |
| 0 visits                   | 77 (90.6%)                             | 86 (89.6%)                                   |
| 1 visit                    | 8 (9.4%)                               | 9 (9.4%)                                     |
| 2 visits                   | 0 (0.0%)                               | 0 (0.0%)                                     |
| 3+ visits                  | 0 (0.0%)                               | 1 (1.0%)                                     |
| All Missing                | 40                                     | 34                                           |

|                         |             | <b>IV Antibiotic Therapy<br/>N=125</b> | <b>Oral Antibiotic<br/>Therapy<br/>N=130</b> |
|-------------------------|-------------|----------------------------------------|----------------------------------------------|
| Nurse at walk-in centre | 0 visits    | 85 (100.0%)                            | 96 (100.0%)                                  |
|                         | 1 visit     | 0 (0.0%)                               | 1 (1.0%)                                     |
|                         | 2 visits    | 0 (0.0%)                               | 1 (1.0%)                                     |
|                         | 3+ visits   | 0 (0.0%)                               | 1 (1.0%)                                     |
|                         | All Missing | 40                                     | 34                                           |
| Other                   | 0 visits    | 76 (89.4%)                             | 89 (92.7%)                                   |
|                         | 1 visit     | 6 (7.1%)                               | 3 (3.1%)                                     |
|                         | 2 visits    | 1 (1.2%)                               | 2 (2.1%)                                     |
|                         | 3+ visits   | 2 (2.4%)                               | 2 (2.1%)                                     |
|                         | All Missing | 40                                     | 34                                           |
| Number of prescriptions |             | 2.02 (2.79)                            | 2.18 (3.02)                                  |
| Missing                 |             | 41                                     | 39                                           |
| <b>Home visits</b>      |             |                                        |                                              |
| GP                      | 0 visits    | 36 (61.0%)                             | 51 (69.9%)                                   |
|                         | 1 visit     | 23 (39.0%)                             | 22 (30.1%)                                   |
|                         | 2 visits    | 0 (0.0%)                               | 0 (0.0%)                                     |
|                         | 3+ visits   | 0 (0.0%)                               | 0 (0.0%)                                     |
|                         | All Missing | 66                                     | 57                                           |
| District Nurse          | 0 visits    | 36 (61.0%)                             | 51 (69.9%)                                   |
|                         | 1 visit     | 21 (35.6%)                             | 21 (28.8%)                                   |
|                         | 2 visits    | 1 (1.7%)                               | 1 (1.4%)                                     |
|                         | 3+ visits   | 1 (1.7%)                               | 0 (0.0%)                                     |
|                         | All Missing | 66                                     | 57                                           |
| Health Visitor          | 0 visits    | 36 (61.0%)                             | 51 (69.9%)                                   |
|                         | 1 visit     | 21 (35.6%)                             | 20 (27.4%)                                   |
|                         | 2 visits    | 1 (1.7%)                               | 0 (0.0%)                                     |
|                         | 3+ visits   | 1 (1.7%)                               | 2 (2.7%)                                     |
|                         | All Missing | 66                                     | 57                                           |
| Nurse                   | 0 visits    | 36 (61.0%)                             | 50 (68.5%)                                   |
|                         | 1 visit     | 15 (25.4%)                             | 18 (24.7%)                                   |
|                         | 2 visits    | 6 (10.2%)                              | 1 (1.4%)                                     |
|                         | 3+ visits   | 2 (3.4%)                               | 4 (5.5%)                                     |
|                         | All Missing | 66                                     | 57                                           |
| Physiotherapy           | 0 visits    | 36 (61.0%)                             | 51 (69.9%)                                   |
|                         | 1 visit     | 19 (32.2%)                             | 20 (27.4%)                                   |
|                         | 2 visits    | 2 (3.4%)                               | 1 (1.4%)                                     |
|                         | 3+ visits   | 2 (3.4%)                               | 1 (1.4%)                                     |
|                         | All Missing | 66                                     | 57                                           |

|                      |                                      | <b>IV Antibiotic Therapy<br/>N=125</b> | <b>Oral Antibiotic<br/>Therapy<br/>N=130</b> |
|----------------------|--------------------------------------|----------------------------------------|----------------------------------------------|
| Occupational therapy | 0 visits                             | 36 (61.0%)                             | 51 (69.9%)                                   |
|                      | 1 visit                              | 23 (39.0%)                             | 22 (30.1%)                                   |
|                      | 2 visits                             | 0 (0.0%)                               | 0 (0.0%)                                     |
|                      | 3+ visits                            | 0 (0.0%)                               | 0 (0.0%)                                     |
|                      | All Missing                          | 66                                     | 57                                           |
|                      | Other                                |                                        |                                              |
| Other                | 0 visits                             | 36 (61.0%)                             | 51 (69.9%)                                   |
|                      | 1 visit                              | 23 (39.0%)                             | 22 (30.1%)                                   |
|                      | 2 visits                             | 0 (0.0%)                               | 0 (0.0%)                                     |
|                      | 3+ visits                            | 0 (0.0%)                               | 0 (0.0%)                                     |
|                      | All Missing                          | 66                                     | 57                                           |
|                      | Home care worker                     |                                        |                                              |
| Home care worker     | 0 visits                             | 55 (96.5%)                             | 63 (90.0%)                                   |
|                      | 1 visit                              | 0 (0.0%)                               | 0 (0.0%)                                     |
|                      | 2 visits                             | 2 (3.5%)                               | 7 (10.0%)                                    |
|                      | 3+ visits                            | 0 (0.0%)                               | 0 (0.0%)                                     |
|                      | All Missing                          | 68                                     | 60                                           |
|                      | <b>Community Based Professionals</b> |                                        |                                              |
| Social worker        |                                      |                                        |                                              |
| Social worker        | 0 visits                             | 55 (96.5%)                             | 63 (90.0%)                                   |
|                      | 1 visit                              | 0 (0.0%)                               | 0 (0.0%)                                     |
|                      | 2 visits                             | 2 (3.5%)                               | 7 (10.0%)                                    |
|                      | 3+ visits                            | 0 (0.0%)                               | 0 (0.0%)                                     |
|                      | All Missing                          | 68                                     | 60                                           |
|                      | Nurse                                |                                        |                                              |
| Nurse                | 0 visits                             | 54 (94.7%)                             | 67 (95.7%)                                   |
|                      | 1 visit                              | 1 (1.8%)                               | 2 (2.9%)                                     |
|                      | 2 visits                             | 1 (1.8%)                               | 1 (1.4%)                                     |
|                      | 3+ visits                            | 1 (1.8%)                               | 0 (0.0%)                                     |
|                      | All Missing                          | 68                                     | 60                                           |
|                      | Physiotherapist                      |                                        |                                              |
| Physiotherapist      | 0 visits                             | 57 (100.0%)                            | 67 (95.7%)                                   |
|                      | 1 visit                              | 0 (0.0%)                               | 2 (2.9%)                                     |
|                      | 2 visits                             | 0 (0.0%)                               | 0 (0.0%)                                     |
|                      | 3+ visits                            | 0 (0.0%)                               | 1 (1.4%)                                     |
|                      | All Missing                          | 68                                     | 60                                           |



**Supplementary Table 16: Societal resource utilisation and missingness**

|                                             | <b>IV Antibiotic Therapy<br/>N=125</b> | <b>Oral Antibiotic Therapy<br/>N=130</b> |
|---------------------------------------------|----------------------------------------|------------------------------------------|
| Patient aids                                |                                        |                                          |
| 0 aids                                      | 43 (74.1%)                             | 54 (78.3%)                               |
| 1 aid                                       | 0 (0.0%)                               | 0 (0.0%)                                 |
| 2 aids                                      | 0 (0.0%)                               | 1 (1.4%)                                 |
| 3+ aids                                     | 15 (25.9%)                             | 15 (21.7%)                               |
| All Missing                                 | 67                                     | 61                                       |
| Transport car                               |                                        |                                          |
| No trips                                    | 1 (0.8%)                               | 5 (4.0%)                                 |
| 0-5 trips                                   | 51 (41.5%)                             | 49 (39.2%)                               |
| 6-10 trips                                  | 7 (5.7%)                               | 13 (10.4%)                               |
| More than 10 trips                          | 64 (52.0%)                             | 58 (46.4%)                               |
| All Missing                                 | 2                                      | 5                                        |
| Transport bus                               |                                        |                                          |
| No trips                                    | 29 (23.2%)                             | 39 (30.0%)                               |
| 0-5 trips                                   | 2 (1.6%)                               | 3 (2.3%)                                 |
| 6-10 trips                                  | 0 (0.0%)                               | 1 (0.8%)                                 |
| More than 10 trips                          | 94 (75.2%)                             | 87 (66.9%)                               |
| All Missing                                 | 0                                      | 1                                        |
| Transport taxi                              |                                        |                                          |
| No trips                                    | 26 (20.8%)                             | 37 (28.5%)                               |
| 0-5 trips                                   | 9 (7.2%)                               | 10 (7.7%)                                |
| 6-10 trips                                  | 1 (0.8%)                               | 0 (0.0%)                                 |
| More than 10 trips                          | 89 (71.2%)                             | 83 (63.8%)                               |
| All Missing                                 | 0                                      | 1                                        |
| Transport other                             |                                        |                                          |
| No trips                                    | 21 (16.8%)                             | 30 (23.3%)                               |
| 0-5 trips                                   | 20 (16.0%)                             | 14 (10.9%)                               |
| 6-10 trips                                  | 0 (0.0%)                               | 2 (1.6%)                                 |
| More than 10 trips                          | 84 (67.2%)                             | 83 (64.3%)                               |
| All Missing                                 | 0                                      | 1                                        |
| Over counter medicines                      |                                        |                                          |
| 0 purchases                                 | 110 (88.0%)                            | 102 (78.5%)                              |
| 1 purchase                                  | 7 (5.6%)                               | 19 (14.6%)                               |
| 2 purchase                                  | 6 (4.8%)                               | 8 (6.2%)                                 |
| 3 purchase                                  | 2 (1.6%)                               | 1 (0.8%)                                 |
| Reported as losing time from work (patient) |                                        |                                          |
| 0                                           | 116 (99.1%)                            | 124 (100.0%)                             |
| 1                                           | 1 (0.9%)                               | 0 (0.0%)                                 |
|                                             |                                        |                                          |
| Reported as losing time from work (carer)   |                                        |                                          |
| 0                                           | 106 (90.6%)                            | 115 (92.7%)                              |
| 1                                           | 11 (9.4%)                              | 9 (7.3%)                                 |
| All Missing                                 | 8                                      | 16                                       |

**Supplementary Table 17: EQ-5D-3L reporting by time-point**

| EQ-5D-3L domain & level         | Baseline              |                         | 3-months              |                         | 15-months             |                         | 24-months             |                         |
|---------------------------------|-----------------------|-------------------------|-----------------------|-------------------------|-----------------------|-------------------------|-----------------------|-------------------------|
|                                 | IV Antibiotic Therapy | Oral Antibiotic Therapy | IV Antibiotic Therapy | Oral Antibiotic Therapy | IV Antibiotic Therapy | Oral Antibiotic Therapy | IV Antibiotic Therapy | Oral Antibiotic Therapy |
| <b>Mobility</b>                 | N=96                  | N=109                   | N=89                  | N=101                   | N=73                  | N=95                    | N=59                  | N=68                    |
| <b>No problems</b>              | 90 (93.8%)            | 104 (95.4%)             | 83 (93.3%)            | 96 (94.1%)              | 60 (82.2%)            | 89 (93.7%)              | 53 (89.8%)            | 64 (94.1%)              |
| <b>Some problems</b>            | 6 (6.3%)              | 5 (4.6%)                | 6 (6.7%)              | 6 (5.9%)                | 13 (17.8%)            | 6 (6.3%)                | 6 (10.2%)             | 4 (5.9%)                |
| <b>Extreme problems</b>         | 0 (0.0%)              | 0 (0.0%)                | 0 (0.0%)              | 0 (0.0%)                | 0 (0.0%)              | 0 (0.0%)                | 0 (0.0%)              | 0 (0.0%)                |
| <b>Self-care</b>                | N=91                  | N=103                   | N=86                  | N=99                    | N=67                  | N=90                    | N=57                  | N=67                    |
| <b>No problems</b>              | 67 (73.6%)            | 87 (84.5%)              | 67 (77.9%)            | 84 (84.8%)              | 55 (75.3%)            | 78 (86.7%)              | 48 (84.2%)            | 61 (89.7%)              |
| <b>Some problems</b>            | 13 (14.3%)            | 5 (4.9%)                | 10 (11.6%)            | 6 (6.1%)                | 12 (16.4%)            | 8 (8.9%)                | 7 (12.3%)             | 4 (5.9%)                |
| <b>Extreme problems</b>         | 11 (12.1%)            | 11 (10.7%)              | 9 (10.5%)             | 9 (9.1%)                | 6 (8.2%)              | 4 (4.4%)                | 2 (3.5%)              | 3 (4.4%)                |
| <b>Usual Activities</b>         | N=96                  | N=108                   | N=89                  | N=99                    | N=70                  | N=94                    | N=58                  | N=66                    |
| <b>No problems</b>              | 81 (84.4%)            | 101 (93.5%)             | 81 (91.0%)            | 89 (89.9%)              | 57 (80.3%)            | 84 (89.4%)              | 53 (91.4%)            | 62 (93.9%)              |
| <b>Some problems</b>            | 13 (13.5%)            | 7 (6.5%)                | 7 (7.9%)              | 10 (10.1%)              | 13 (18.3%)            | 10 (10.6%)              | 4 (6.9%)              | 4 (6.1%)                |
| <b>Extreme problems</b>         | 2 (2.1%)              | 0 (0.0%)                | 1 (1.1%)              | 0 (0.0%)                | 1 (1.4%)              | 0 (0.0%)                | 1 (1.7%)              | 0 (0.0%)                |
| <b>Pain &amp; Discomfort</b>    | N=95                  | N=109                   | N=89                  | N=100                   | N=71                  | N=94                    | N=58                  | N=68                    |
| <b>No problems</b>              | 76 (80.0%)            | 89 (81.7%)              | 73 (82.0%)            | 82 (82.0%)              | 54 (74.0%)            | 77 (81.9%)              | 44 (75.9%)            | 59 (86.8%)              |
| <b>Some problems</b>            | 19 (20.0%)            | 19 (17.4%)              | 16 (18.0%)            | 18 (18.0%)              | 17 (23.3%)            | 17 (18.1%)              | 14 (24.1%)            | 9 (13.2%)               |
| <b>Extreme problems</b>         | 0.0%                  | 1 (0.9%)                | 0 (0.0%)              | 0 (0.0%)                | 2 (2.7%)              | 0 (0.0%)                | 0 (0.0%)              | 0 (0.0%)                |
| <b>Anxiety &amp; Depression</b> | N=95                  | N=108                   | N=88                  | N=99                    | N=71                  | N=94                    | N=59                  | N=66                    |
| <b>No problems</b>              | 82 (86.3%)            | 96 (88.9%)              | 75 (85.2%)            | 88 (88.9%)              | 58 (80.6%)            | 82 (87.2%)              | 50 (84.7%)            | 63 (95.5%)              |
| <b>Some problems</b>            | 12 (12.6%)            | 12 (11.1%)              | 11 (12.5%)            | 11 (11.1%)              | 13 (18.1%)            | 11 (11.7%)              | 9 (15.3%)             | 2 (3.0%)                |
| <b>Extreme problems</b>         | 1 (1.1%)              | 0 (0.0%)                | 2 (2.3%)              | 0 (0.0%)                | 1 (1.4%)              | 1 (1.1%)                | 0 (0.0%)              | 1 (1.5%)                |

**Supplementary Table 18: Incremental costs, outcomes, ICERs and incremental net benefit between trial arms for the sensitivity analysis**

|                                                                                                                                                                                                                                                                                      | <b>Incremental Cost<sup>^</sup><br/>£</b> | <b>Incremental Outcome<sup>^</sup></b> | <b>ICER</b>    | <b>Incremental net monetary benefit*<br/>£</b> |
|--------------------------------------------------------------------------------------------------------------------------------------------------------------------------------------------------------------------------------------------------------------------------------------|-------------------------------------------|----------------------------------------|----------------|------------------------------------------------|
| Primary analysis - % successful eradication, NHS and PSS perspective costs, 15-month horizon, covariate adjusted, Cystic Fibrosis HRG used                                                                                                                                           | -653.08 (95% CI:-1197.8, -79.8)           | 0.091 (95% CI:-0.034, 0.22)            | Oral dominates | N/A**                                          |
| Primary analysis - % successful eradication, societal perspective costs, 15-month horizon, adjusted                                                                                                                                                                                  | -5937.0 (95% CI: -7120.8, -4659.1)        | 0.091 (95% CI:-0.034, 0.22)            | Oral dominates | N/A**                                          |
| Secondary analysis - 24-month horizon QALYs, NHS and PSS perspective costs, covariate adjusted                                                                                                                                                                                       | -5938.5 (95% CI:-7107.4, -4666.3)         | 0.058 (95% CI:-0.004, 0.140)           | Oral dominates | 7229.8 (95% CI: 5411.8, 8553.1)                |
| Secondary analysis - 15-month horizon QALYs, NHS and PSS perspective costs, covariate, Cystic Fibrosis HRG used                                                                                                                                                                      | -653.08 (95% CI:-1197.8, -79.8)           | 0.035 (95% CI:-0.007, 0.088)           | Oral dominates | 653.1 (95% CI: 79.8, 1197.8)                   |
| Secondary analysis - 15 months QALYs, societal perspective costs, 15-month horizon, covariate                                                                                                                                                                                        | -5937.0 (95% CI: -7052.6, -4713.2)        | 0.035 (95% CI:-0.007, 0.088)           | Oral dominates | 6755.7 (95% CI: 4977.4 to 8409.3)              |
| <sup>^</sup> Adjusting for baseline EQ5D and age (in days) in linear regression<br>*At a cost-effectiveness threshold of £20,000 per QALY<br>**There is no societally accepted willingness-to-pay threshold associated with the primary outcome measure and so this is not reported. |                                           |                                        |                |                                                |

**Supplementary Figure 1a and Figure 1b: Incremental cost-effectiveness plane (top) and cost-effectiveness acceptability curve (bottom). Based on: % successful eradication, NHS and PSS perspective costs, covariate adjusted\***

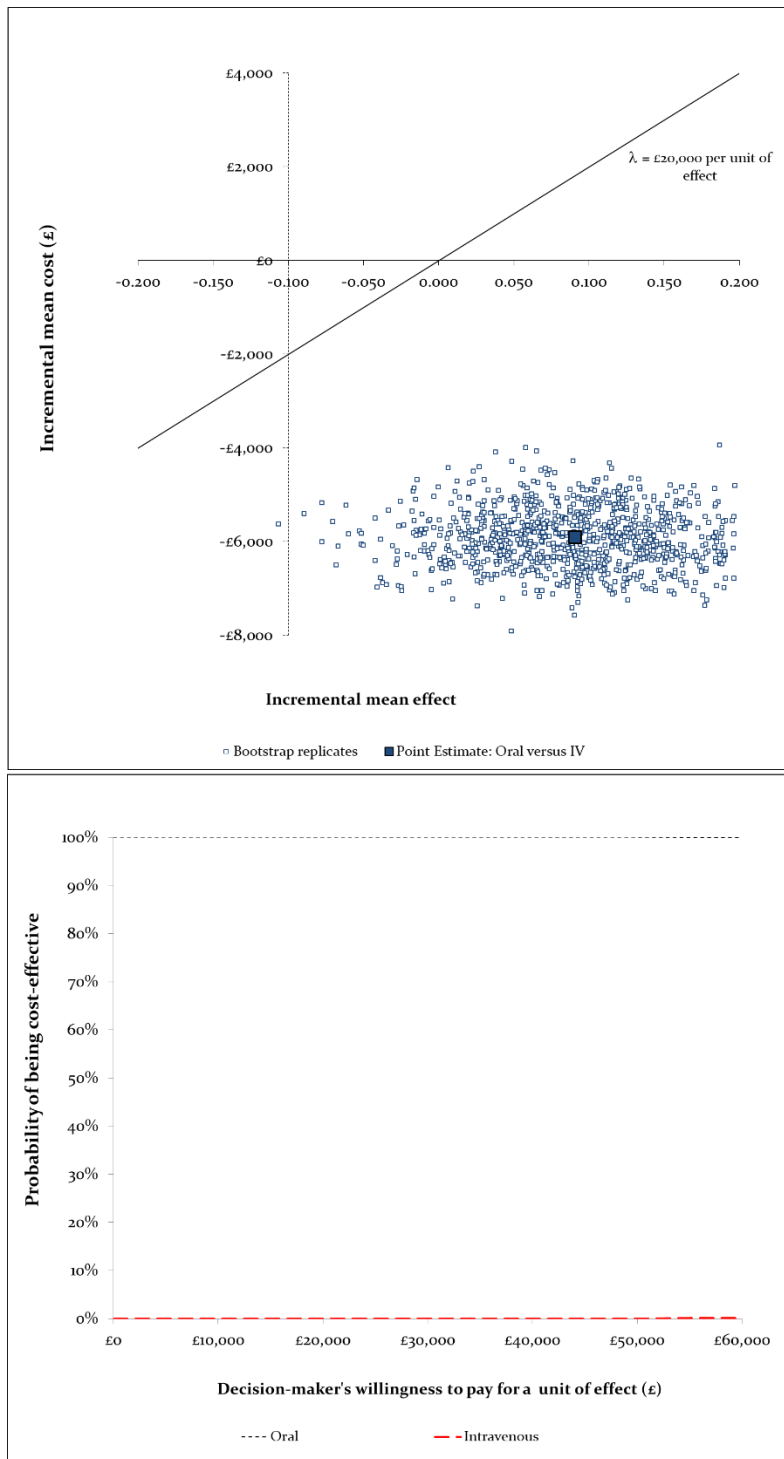

\*Top figure: Blue squares represent bootstrap samples (n=2000) from the data for incremental cost and incremental QALYs for oral versus intravenous. The large square represents mean point estimates for incremental costs and QALYs. Squares falling below the threshold line suggest that oral is cost-effective versus intravenous for the given threshold.

**Supplementary Figure 2a and 2b: Incremental cost-effectiveness plane (top) and cost-effectiveness acceptability curve (bottom). Based on: 15-month horizon QALYs, NHS and PSS perspective costs, covariate-adjusted\***

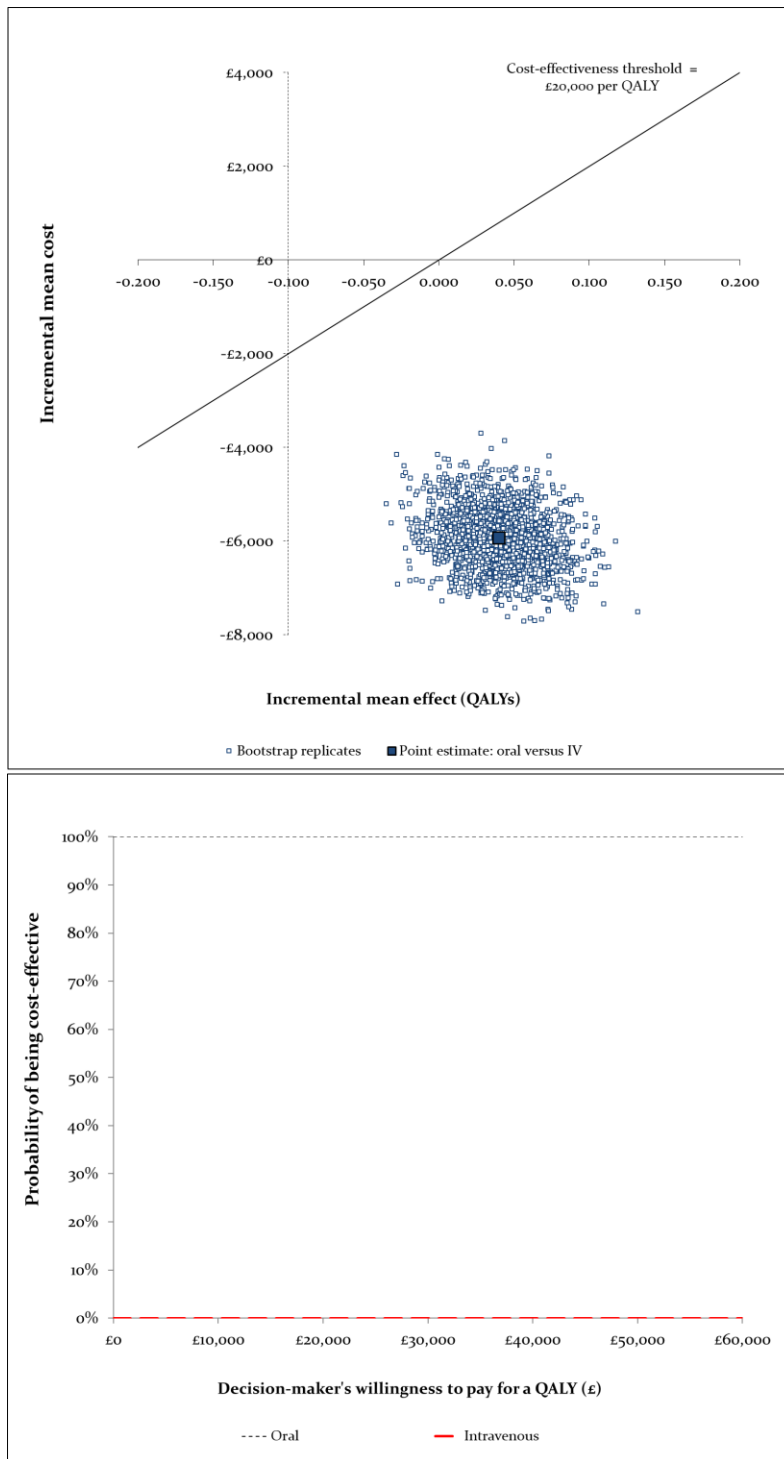

\*Top figure: Blue squares represent bootstrap samples (n=2000) from the data for incremental cost and incremental QALYs for oral versus intravenous. The large square represents mean point estimates for incremental costs and QALYs. Squares falling below the threshold line suggest that oral is cost-effective versus intravenous for the given threshold. The threshold line is plotted for £20,000 per QALY as typically used by the National Institute for Health and Care Excellence (NICE).
